# Supplementary material
Source: publisher figshare collection journal article supplement (https://springernature.figshare.com/ndownloader/files/21032253)
Supplement: Supplementary file [file 21032253]

***Annex 1. Overview of data collected in the case study KAA Gent Foundation***

| <b><i>Data sources</i></b>                                                                                                               | <b><i>Time of collection</i></b> | <b><i>Hours / N</i></b>                                   |
|------------------------------------------------------------------------------------------------------------------------------------------|----------------------------------|-----------------------------------------------------------|
| Documents: <i>Policy plan; subvention policy; year reports (2017, 2018), internal documents e.g. training curriculum of Team Buffalo</i> | Jan - Dec 2018                   |                                                           |
| Observations                                                                                                                             | May – July 2018                  | 57,5 hours observation                                    |
| GP                                                                                                                                       | May - July 2018                  | 5 * 1,5h training<br>1 * 24h tournament with sleep-over   |
| GB                                                                                                                                       | April - July 2018                | 6 * 2h training<br>2 * 4h tournament and/or team activity |
| Buffalo League                                                                                                                           | May 2018                         | 2 * 2h activity                                           |
| Buffalo Dance Academy                                                                                                                    | May 2018                         | 2 * 1h activity                                           |
| Semi-structured interviews                                                                                                               |                                  |                                                           |
| GP                                                                                                                                       | Nov - Oct 2018                   | N=5 (1 female, 4 male)                                    |

|                                                                                                                                                                                             |                |                        |
|---------------------------------------------------------------------------------------------------------------------------------------------------------------------------------------------|----------------|------------------------|
| GB                                                                                                                                                                                          | Nov - Oct 2018 | N=6 (1 female, 5 male) |
| Focus group: <i>2 participants who are also member of the steering group; 1 city sports council representative; 3 representatives from psychiatric care services; 2 sport+ coordinators</i> | Nov 2018       | N=8                    |
